# Supplementary material for: Elimination of subtelomeric repeat sequences exerts little effect on telomere essential functions in Saccharomyces cerevisiae
Source: eLife journal article supplement (doi:10.7554/elife.91223), 2023-10-05
Supplement: fig2-data1 [file Figure 2B-source data 1 growth analysis of the SY12 tlc1Δ strain.xlsx]

## Sheet: Sheet1
Related to Figure 2B
Days	SY12	SY12 tlc1Δ-1	SY12 tlc1Δ-2	SY12 tlc1Δ-3
1	3.715	2.958	3.214	2.887
2	3.503	2.82	2.775	2.475
3	3.593	2.812	2.483	2.026
4	3.693	1.638	1.494	0.3769
5	3.859	0.2245	0.2423	1.876
6	3.429	3.407	0.1304	3.097
7	3.738	3.577	3.358	3.342
8	3.662	3.382	3.348	3.048
9	3.462	3.589	3.014	3.136
10	3.501	3.563	3.349	3.186
11	3.007	3.353	3.132	3.003
12	3.81903	3.76776	3.07767	3.1137
