# Supplementary material for: Elimination of subtelomeric repeat sequences exerts little effect on telomere essential functions in Saccharomyces cerevisiae
Source: eLife journal article supplement (doi:10.7554/elife.91223), 2023-10-05

**A**

*S. cerevisiae*

SY15  
SY12  
SY12-*tlc1*ΔC1  
SY12<sup>YΔ</sup>  
SY12<sup>YΔ</sup>-*tlc1*ΔC1  
SY12<sup>YΔ</sup>  
SY12<sup>YΔ</sup>-*tlc1*ΔC1  
SY12<sup>YΔ</sup>  
SY12<sup>YΔ</sup>-*tlc1*ΔC1  
Marker

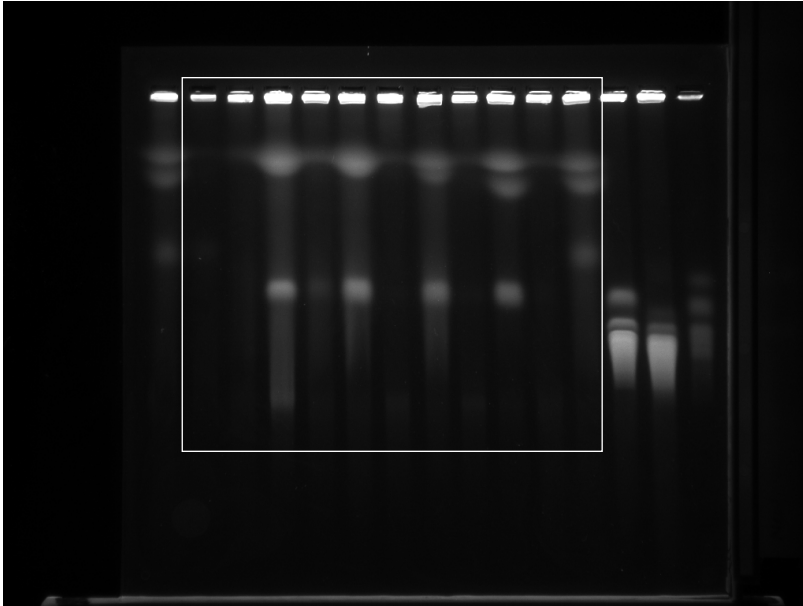

Supplement: fig2-figsupp5-data2 [file elife-91223-fig2-figsupp5-data2-v1.zip]
