# Supplementary material for: Elimination of subtelomeric repeat sequences exerts little effect on telomere essential functions in Saccharomyces cerevisiae
Source: eLife journal article supplement (doi:10.7554/elife.91223), 2023-10-05
Supplement: fig2-figsupp7-data1 [file Figure2-figure supplementary 7A- source data1 growth analysis of the SY12 tlc1Δ rad52Δstrain.xlsx]

## Sheet: Sheet1
Related to Figure 2-figure supplement 7A
Days	SY12	SY12 tlc1Δ-1	SY12 tlc1Δ-2	SY12 rad52Δ tlc1Δ-1	SY12 rad52Δ tlc1Δ-2	SY12 rad52Δ tlc1Δ-3
1	3.08	2.69	2.87	2.41	2.37	1.9
2	2.686	2.584	2.639	1.996	0.823	1.841
3	3.156	2.797	2.762	1.765	0.839	0.2359
4	2.51	2.516	2.002	0.989	0.3211	0.0467
5	3.205	1.615	1.582	0.815	0.789	0.1581
6	3.297	0.717	0.901	0.343	1.67	0.4296
7	2.587	1.064	1.123	0.523	1.588	0.563
8	2.529	2.37	1.321	1.08	1.87	0.624
9	2.781	2.581	2.604	1.25	2.04	1.169
10	3.245	2.657	2.962	1.831	1.995	0.935
11	2.905	2.793	2.758	2.023	2.098	1.023
12	3.022	2.845	2.704	2.074	2.19	1.11
