# Supplementary material for: Elimination of subtelomeric repeat sequences exerts little effect on telomere essential functions in Saccharomyces cerevisiae
Source: eLife journal article supplement (doi:10.7554/elife.91223), 2023-10-05
Supplement: fig3-data19 [file Figure 3E-source data 1 Excel file containing output results of the growth analysis of SY12 subtelomeric delection strains.xlsx]

## Sheet: Sheet1
Related to Figure 3E
Hours		BY4742			SY12			SY12YΔ			SY12XYΔ			SY12XYΔ+Y
0	0.1	0.1	0.1	0.1	0.1	0.1	0.1	0.1	0.1	0.1	0.1	0.1	0.1	0.1	0.1
1	0.146	0.141	0.127	0.125	0.131	0.14	0.148	0.155	0.148	0.134	0.15	0.143	0.142	0.157	0.137
2	0.163	0.17	0.161	0.161	0.156	0.166	0.142	0.185	0.186	0.158	0.155	0.171	0.154	0.166	0.157
3	0.202	0.198	0.176	0.223	0.195	0.187	0.187	0.233	0.201	0.173	0.207	0.179	0.162	0.179	0.176
4	0.317	0.297	0.243	0.261	0.273	0.275	0.284	0.25	0.301	0.259	0.247	0.229	0.25	0.256	0.242
5	0.462	0.41	0.343	0.273	0.303	0.385	0.393	0.407	0.431	0.318	0.315	0.286	0.334	0.33	0.318
6	0.607	0.545	0.465	0.359	0.482	0.508	0.536	0.538	0.593	0.426	0.426	0.395	0.448	0.435	0.423
7	0.881	0.807	0.712	0.545	0.719	0.773	0.809	0.794	0.858	0.638	0.635	0.59	0.645	0.651	0.642
8	1.147	1.067	0.974	0.754	0.982	1.025	1.073	1.067	1.133	0.861	0.867	0.797	0.881	0.878	0.871
9	1.367	1.329	1.245	1.001	1.276	1.258	1.314	1.304	1.365	1.126	1.121	1.062	1.137	1.146	1.125
10	1.527	1.536	1.499	1.287	1.466	1.502	1.464	1.493	1.471	1.352	1.382	1.29	1.371	1.361	1.358
11	1.578	1.618	1.603	1.485	1.593	1.603	1.548	1.612	1.552	1.502	1.507	1.456	1.502	1.501	1.502
12	1.591	1.631	1.641	1.612	1.645	1.664	1.572	1.658	1.59	1.605	1.617	1.571	1.612	1.604	1.607
13	1.613	1.643	1.647	1.623	1.663	1.684	1.601	1.665	1.571	1.652	1.655	1.624	1.648	1.646	1.651
14	1.623	1.653	1.655	1.643	1.674	1.698	1.611	1.705	1.615	1.674	1.686	1.66	1.674	1.68	1.667
15	1.68	1.677	1.675	1.644	1.689	1.71	1.61	1.706	1.63	1.689	1.704	1.666	1.686	1.693	1.68
25	1.953	1.966	1.943	1.907	1.889	1.907	1.817	1.904	1.902	1.886	1.865	1.803	1.852	1.853	1.862
