# Supplementary material for: Elimination of subtelomeric repeat sequences exerts little effect on telomere essential functions in Saccharomyces cerevisiae
Source: eLife journal article supplement (doi:10.7554/elife.91223), 2023-10-05
Supplement: fig3-data20 [file Figure 3F-source data 1 Original FACS analysis results..pdf › Figure 3F-source data 1 Original FACS analysis results..pdf]

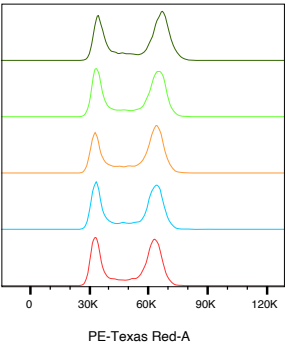

|                        | Sample Name               | Subset Name | Count |
|------------------------|---------------------------|-------------|-------|
| <div><div></div></div> | 20220720_Tube_002_002.fcs | 002-2       | 8553  |
| <div><div></div></div> | 20220720_Tube_005_005.fcs | 002-2       | 8511  |
| <div><div></div></div> | 20220720_Tube_007_007.fcs | 002-2       | 7828  |
| <div><div></div></div> | 20220720_Tube_025_025.fcs | 002-2       | 7899  |
| <div><div></div></div> | 20220720_Tube_027_027.fcs | 002-2       | 8064  |
