# Supplementary material for: Elimination of subtelomeric repeat sequences exerts little effect on telomere essential functions in Saccharomyces cerevisiae
Source: eLife journal article supplement (doi:10.7554/elife.91223), 2023-10-05

**G**

24°C

30°C

37°C

BY4742-*mre11*Δ  
BY4742  
SY12  
SY12<sup>YΔ</sup>  
SY12<sup>KYΔ</sup>  
SY12<sup>KYΔ+Y</sup>

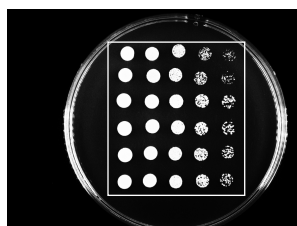

MMS  
0.02%

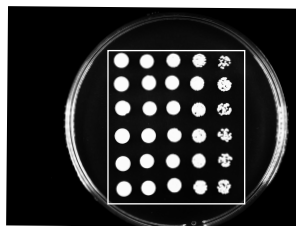

CPT  
8 μg ml<sup>-1</sup>

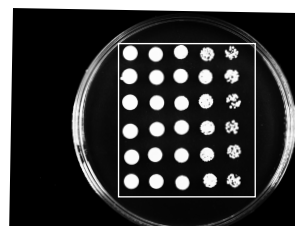

HU  
25 mM

BY4742-*mre11*Δ  
BY4742  
SY12  
SY12<sup>YΔ</sup>  
SY12<sup>KYΔ</sup>  
SY12<sup>KYΔ+Y</sup>

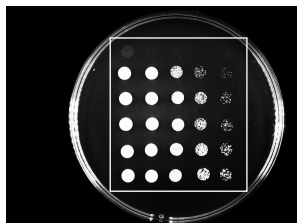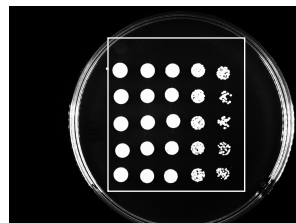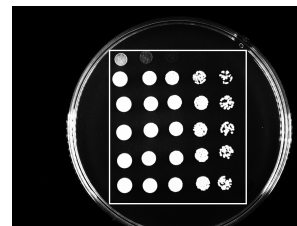

Supplement: fig3-data27 [file PDF containing Figure 3G and original scans of the relevant dotting blot analysis.pdf › PDF containing Figure 3G and original scans of the relevant dotting blot analysis.pdf]
