# Supplementary material for: Elimination of subtelomeric repeat sequences exerts little effect on telomere essential functions in Saccharomyces cerevisiae
Source: eLife journal article supplement (doi:10.7554/elife.91223), 2023-10-05
Supplement: fig4-data3 [file Figure 4B-source data 1 Excel file containing output results of qPCR.xlsx]

## Sheet: Sheet1
Related to Figure 4B
XVI-L
BY4742			BY4742 sir2			SY12			SY12 sir2			SY12Y			SY12Ysir2			SY12XY			SY12XYsir2			SY12XY+			SY12XYΔ+Y sir2Δ
1	1	1	3.3701	2.94739	1.24658	0.056891	0.037654	0.030375	0.755109	0.610205	0.28248	0.060366	0.051291	0.100956	2.2494	2.00949	1.71364	0.392305	0.144721	0.154222	4.13797	4.48567	5.83231	0.076275	0.333201	0.078208	3.77096	4.25099	4.06624
	BY4742 sir2	P value	0.1437		SY12 sir2	P value	0.0677		SY12Ysir2	P value	0.0061		SY12XYsir2	P value	0.011		SY12XY+sir2	P value	<0.0001
	vs.	P value summary	ns		vs.	P value summary	ns		vs.	P value summary	**		vs.	P value summary	*		vs.	P value summary	****
	BY4742	Significantly different (P < 0.05)?	No		SY12	Significantly different (P < 0.05)?	No		SY12Y	Significantly different (P < 0.05)?	Yes		SY12XY	Significantly different (P < 0.05)?	Yes		SY12XY+	Significantly different (P < 0.05)?	Yes
		One- or two-tailed P value?	Two-tailed			One- or two-tailed P value?	Two-tailed			One- or two-tailed P value?	Two-tailed			One- or two-tailed P value?	Two-tailed			One- or two-tailed P value?	Two-tailed
		Welch-corrected t, df	t=2.344, df=2.000			Welch-corrected t, df	t=3.625, df=2.013			Welch-corrected t, df	t=12.33, df=2.039			Welch-corrected t, df	t=8.773, df=2.098			t, df	t=23.61, df=4
X-R
BY4742			BY4742-sir2			SY12			SY12-sir2			SY12Y			SY12Ysir2			SY12-XY			SY12XYsir2			SY12XY+			SY12XYΔ+Y sir2Δ
1	1	1	1.739	1.03469	0.963017	0.045051	0.202691	0.170865	0.236059	0.549382	0.356707	0.233115	0.168344	0.151134	0.385756	0.44851	0.288352	0.253544	0.13221	0.094444	0.780222	1.01562	0.553724	0.079481	0.079738	0.188671	0.704673	0.65839	0.710935
	BY4742 sir2	P value	0.455				SY12 sir2	P value	0.0962				SY12Ysir2	P value	0.0216				SY12XYsir2	P value	0.0114				SY12XY+sir2	P value	<0.0001
	vs.	P value summary	ns				vs.	P value summary	ns				vs.	P value summary	*				vs.	P value summary	*				vs.	P value summary	****
	BY4742	Significantly different (P < 0.05)?	No				SY12	Significantly different (P < 0.05)?	No				SY12Y	Significantly different (P < 0.05)?	Yes				SY12XY	Significantly different (P < 0.05)?	Yes				SY12XY+	Significantly different (P < 0.05)?	Yes
		One- or two-tailed P value?	Two-tailed					One- or two-tailed P value?	Two-tailed					One- or two-tailed P value?	Two-tailed					One- or two-tailed P value?	Two-tailed					One- or two-tailed P value?	Two-tailed
		Welch-corrected t, df	t=0.9192, df=2.000					t, df	t=2.166, df=4					t, df	t=3.656, df=4					t, df	t=4.434, df=4					t, df	t=15.74, df=4
