# Supplementary material for: Elimination of subtelomeric repeat sequences exerts little effect on telomere essential functions in Saccharomyces cerevisiae
Source: eLife journal article supplement (doi:10.7554/elife.91223), 2023-10-05
Supplement: fig5-data1 [file Figure 5A-source data 1 Excel file containing output results of growth analysis of the SY12 YΔ tlc1Δ strain.xlsx]

## Sheet: Sheet1
Related to Figure 5A
Days	SY12YΔ	SY12YΔ-tlc1Δ-1	SY12YΔ-tlc1Δ-2	SY12YΔ-tlc1Δ-3
1	3.06	3.067	3.772	3.47
2	3.051	3.66	3.453	3.941
3	2.87	2.923	3.204	3.217
4	3.027	2.326	3.303	3.234
5	2.571	1.506	1.817	1.923
6	3.288	1.794	0.4284	1.124
7	3.306	0.696	0.4549	2.091
8	3.386	0.1632	3.098	3.581
9	3.19	0.1508	3.286	3.539
10	3.329	3.029	3.556	3.48
11	2.986	3.49	3.496	3.736
12	3.1331	3.587	3.51001	3.688
