# Supplementary material for: Elimination of subtelomeric repeat sequences exerts little effect on telomere essential functions in Saccharomyces cerevisiae
Source: eLife journal article supplement (doi:10.7554/elife.91223), 2023-10-05
Supplement: fig5-figsupp3-data1 [file Figure 5 - figure supplementary 3A source data 1. Excel file containing output results of growth analysis of the SY12YΔ tlc1Δ rad52Δ strain..xlsx]

## Sheet: Sheet1
Related to Figure 5-figure supplement 3A
Days	SY12YΔ	SY12YΔ tlc1Δ-1	SY12YΔ tlc1Δ-2	SY12YΔ rad52Δ tlc1Δ-1	SY12YΔ rad52Δ tlc1Δ-2	SY12YΔ rad52Δ tlc1Δ-3
1	2.76	2.35	2.41	2.45	2.27	2.28
2	2.854	2.494	2.621	0.8	0.18	1.2491
3	2.69	2.479	2.395	0.1228	0.0321	0.141
4	2.281	1.752	1.505	0.0531	0.017	0.2206
5	2.683	0.29	0.919	0.15	0.0458	0.1059
6	2.951	0.309	1.929	0.933	0.0573	0.2217
7	2.835	1.549	2.464	1.025	0.1498	0.2856
8	2.705	2.122	2.765	1.191	0.562	0.5265
9	2.823	2.759	2.395	1.84	0.6385	0.802
10	3.086	2.967	2.595	1.91	1.549	0.851
11	2.533	2.703	2.741	2.074	2.186	1.0168
12	2.752	2.504	2.803	2.07	2.086	1.451
