# Supplementary material for: Elimination of subtelomeric repeat sequences exerts little effect on telomere essential functions in Saccharomyces cerevisiae
Source: eLife journal article supplement (doi:10.7554/elife.91223), 2023-10-05
Supplement: fig6-figsupp1-data1 [file Figure 6-figure supplementary 6A -source data 1 -Excel file containing output results of growth analysis of the SY12 XYΔ+Y tlc1Δ rad52Δ strain.xlsx]

## Sheet: Sheet1
Related to Figure 6-figure supplement 6A
Days	SY12XYΔ+Y	SY12XYΔ+Y tlc1Δ-1	SY12XY+YΔ tlc1Δ-2	SY12XYΔ+Y tlc1Δ rad52Δ-1	SY12XYΔ+Y tlc1Δ rad52Δ-2	SY12XYΔ+Y tlc1Δ rad52Δ-3
1	2.72	2.78	2.59	2.38	2.45	1.747
2	2.632	2.791	1.274	1.29	0.867	1.5739
3	2.66	2.718	1.305	0.5673	0.2121	0.3787
4	2.724	1.224	0.209	0.2025	0.0439	0.1858
5	2.573	1.02	1.954	0.0486	0.0385	0.1343
6	2.864	1.681	2.052	0.1022	0.1289	0.2477
7	2.729	1.812	2.139	1.267	0.1886	0.4348
8	2.631	2.025	2.588	1.338	0.745	0.4756
9	2.798	2.495	2.276	1.936	1.088	1.462
10	2.833	2.606	2.974	1.754	2.077	1.823
11	2.659	2.568	2.364	1.635	2.136	1.58
12	2.65	2.391	2.177	2.071	2.023	1.596
