# Supplementary figures and images for: Elimination of subtelomeric repeat sequences exerts little effect on telomere essential functions in Saccharomyces cerevisiae
Source: eLife journal article supplement (doi:10.7554/elife.91223), 2023-10-05

D

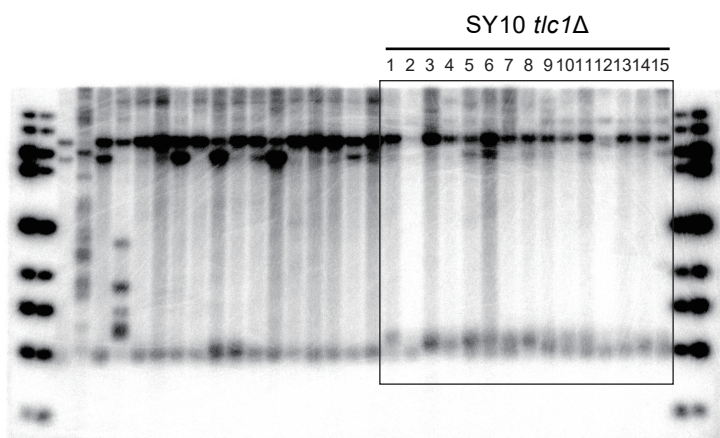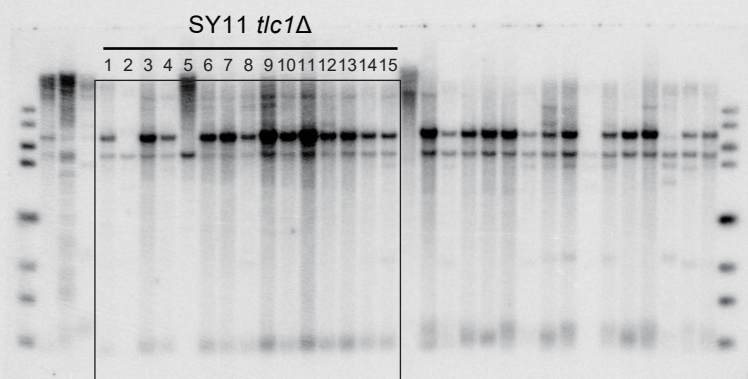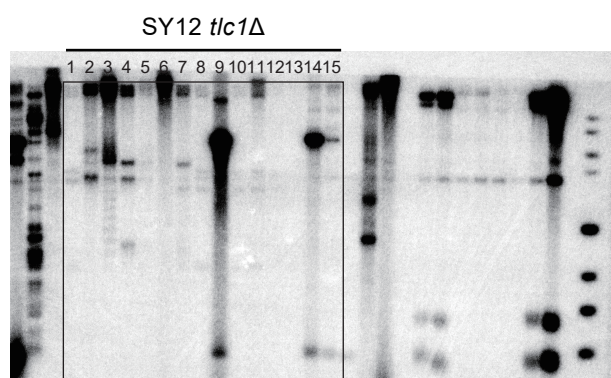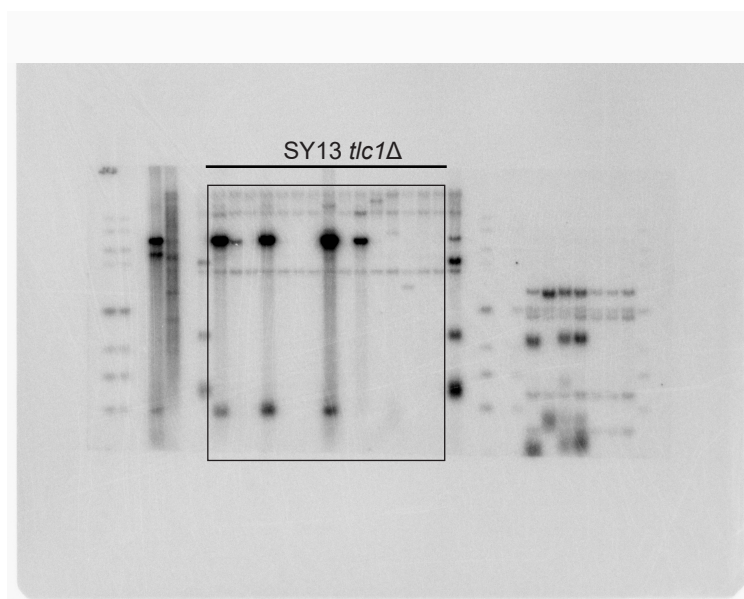

Supplement: fig1-data14 [file elife-91223-fig1-data14-v1.zip]

**A**

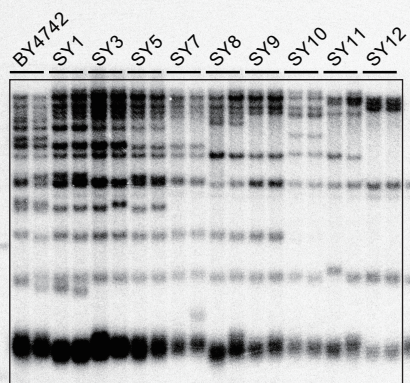

Supplement: fig1-data2 [file elife-91223-fig1-data2-v1.zip]

B

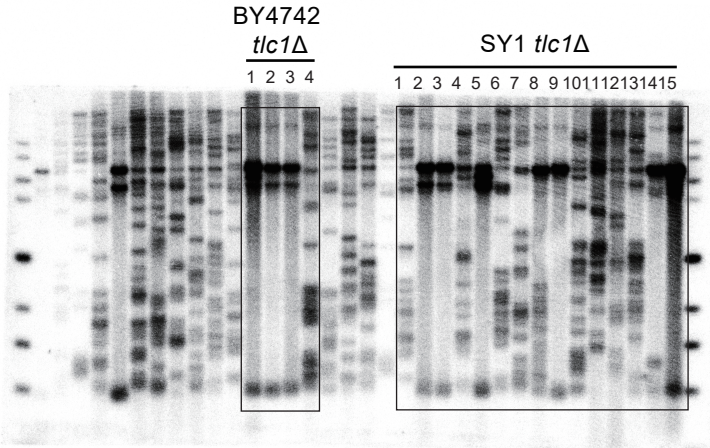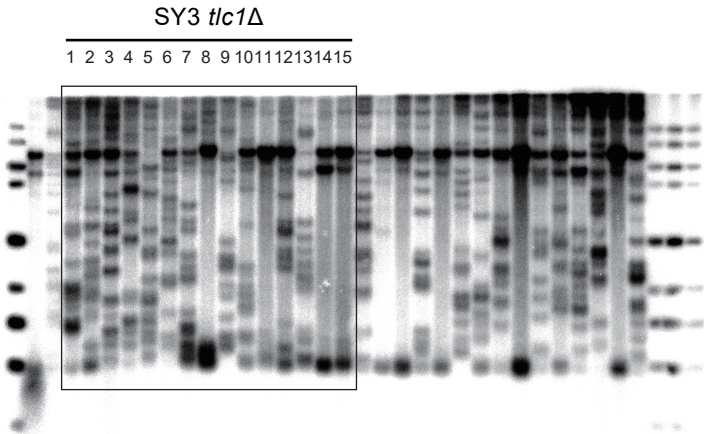

Supplement: fig1-data5 [file elife-91223-fig1-data5-v1.zip]

C

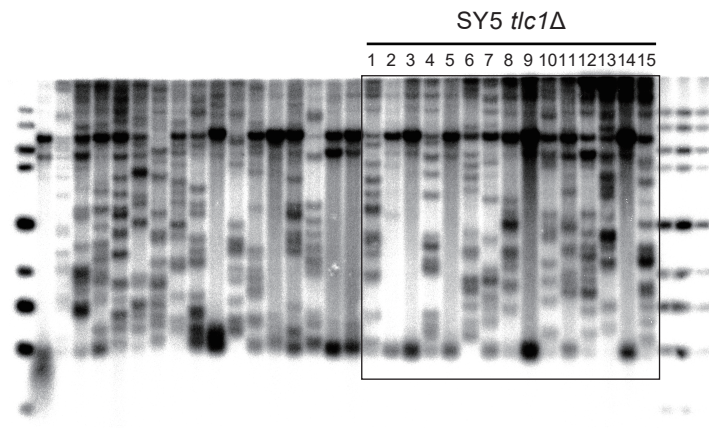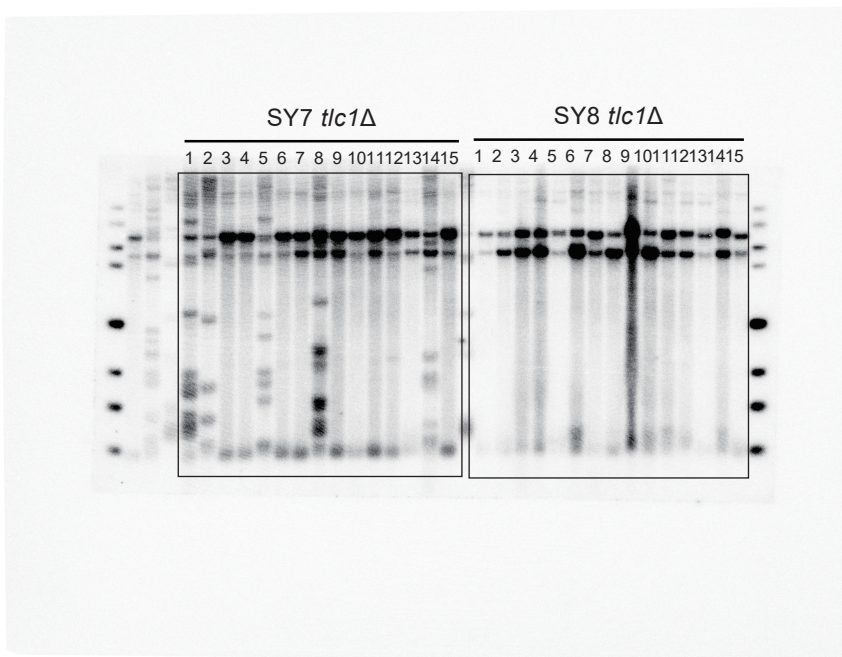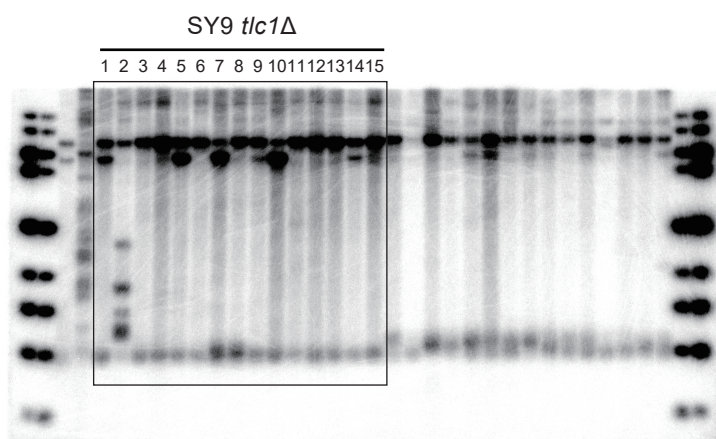

Supplement: fig1-data9 [file elife-91223-fig1-data9-v1.zip]

G

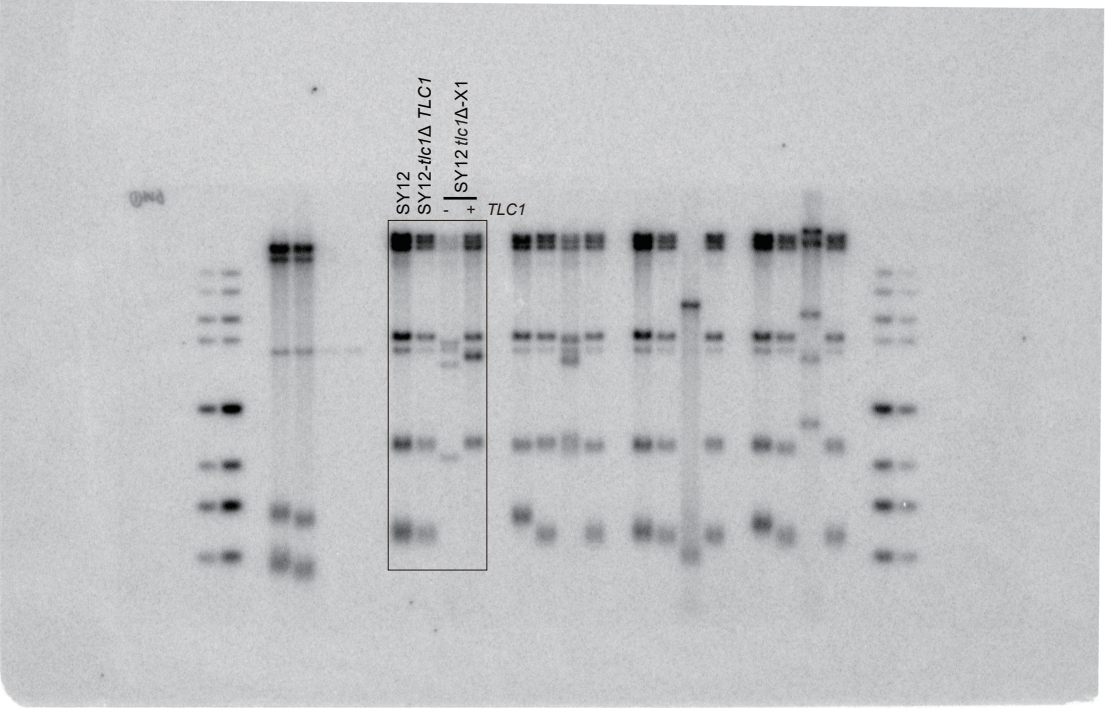

Supplement: fig2-data12 [file PDF containing Figure 2G and original scans of the relevant Southern blot analysis.pdf › PDF containing Figure 2G and original scans of the relevant Southern blot analysis.pdf]

SY12  
SY12-*tlc1Δ* TLC1  
+ SY12 *tlc1Δ*-X1

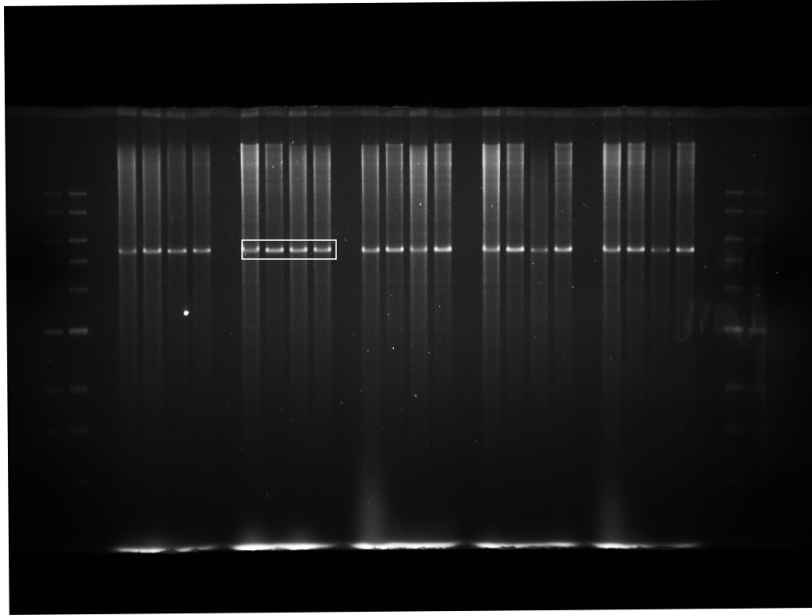

Supplement: fig2-data13 [file PDF containing original scans of the loading contral in Figure 2G.pdf › PDF containing original scans of the loading contral in Figure 2G.pdf]

C

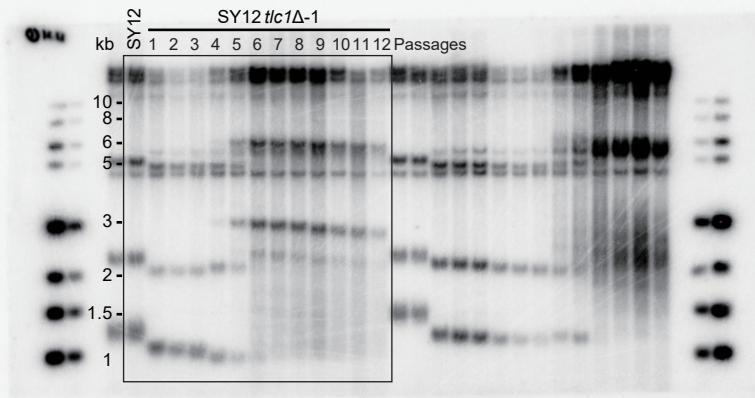

Supplement: fig2-data3 [file elife-91223-fig2-data3-v1.zip]

D

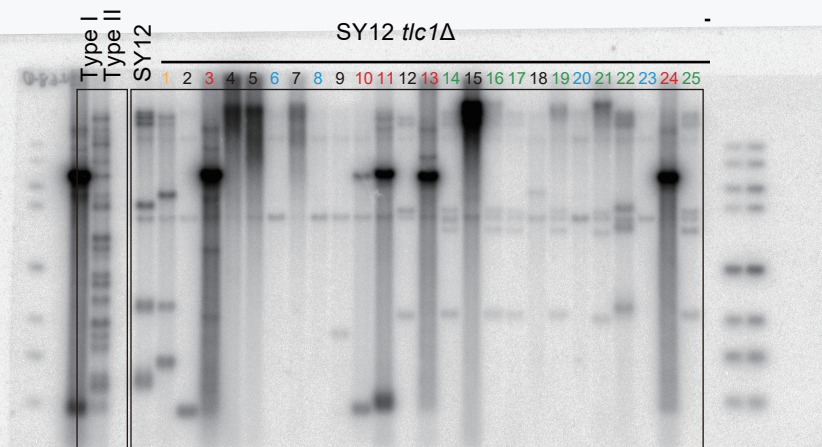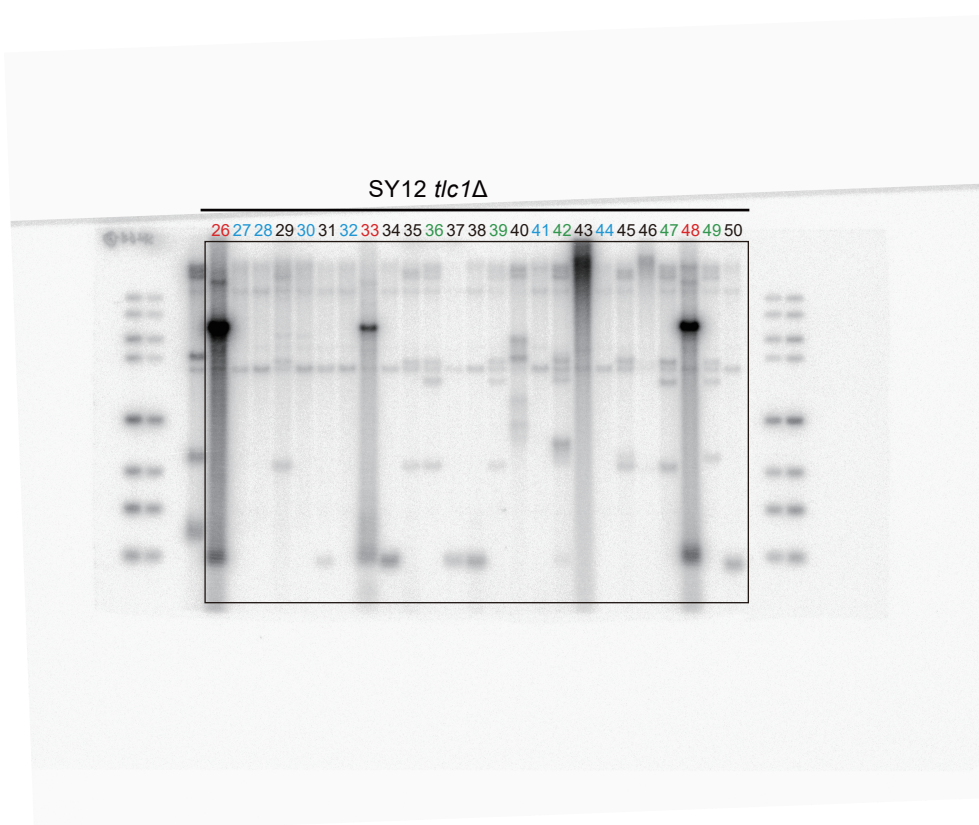

Supplement: fig2-data8 [file elife-91223-fig2-data8-v1.zip]

D

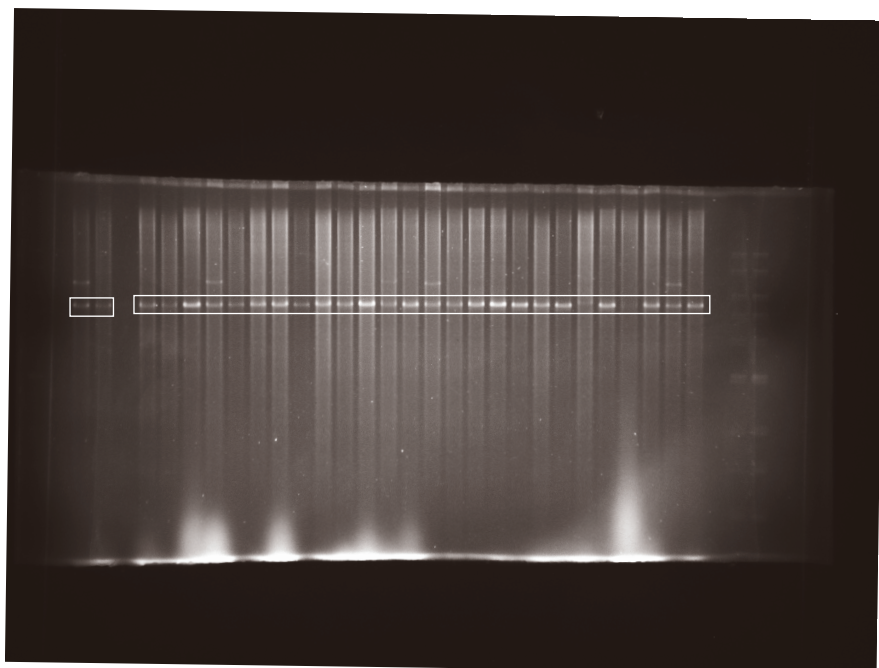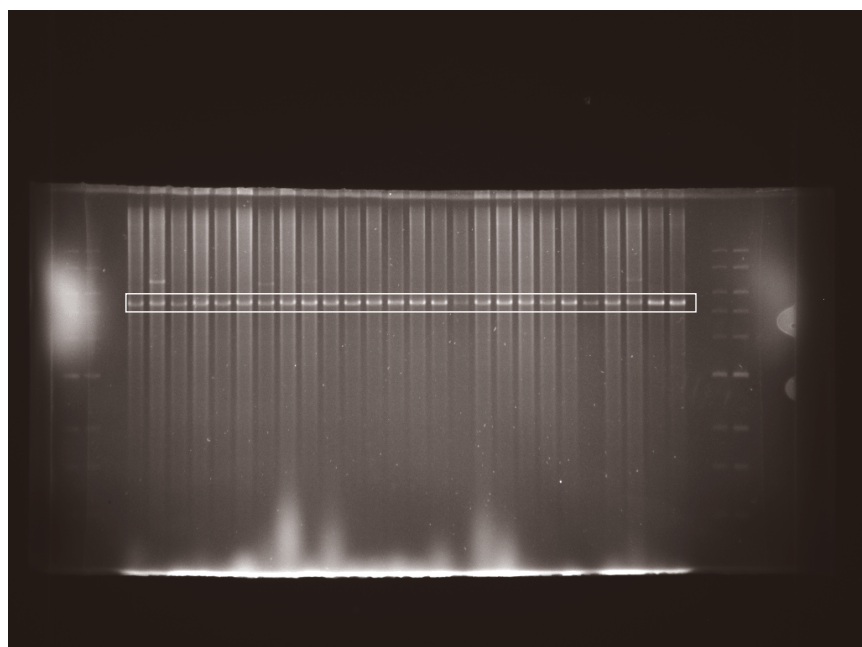

Supplement: fig2-data9 [file elife-91223-fig2-data9-v1.zip]

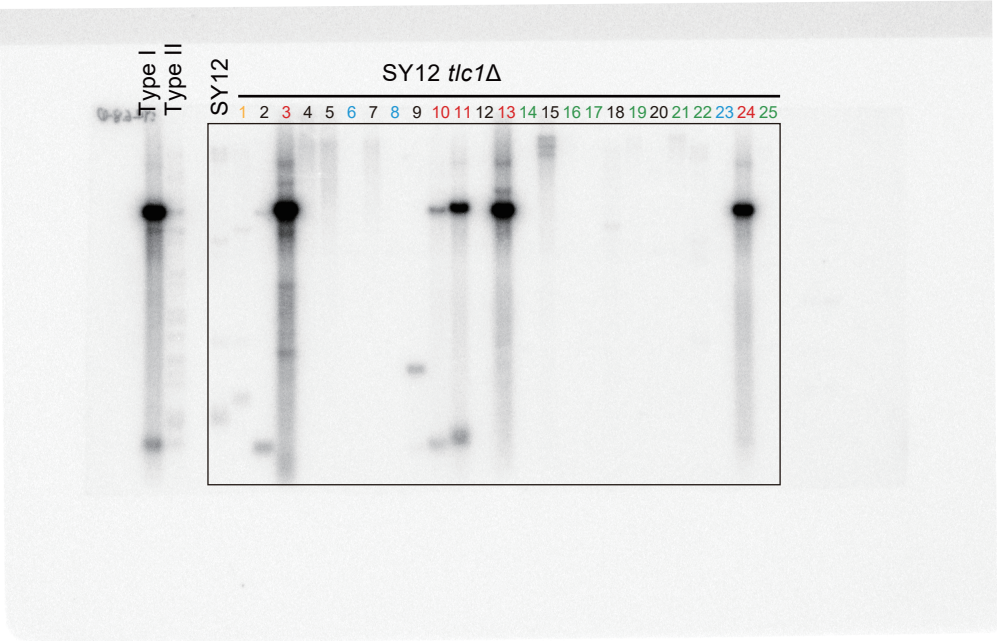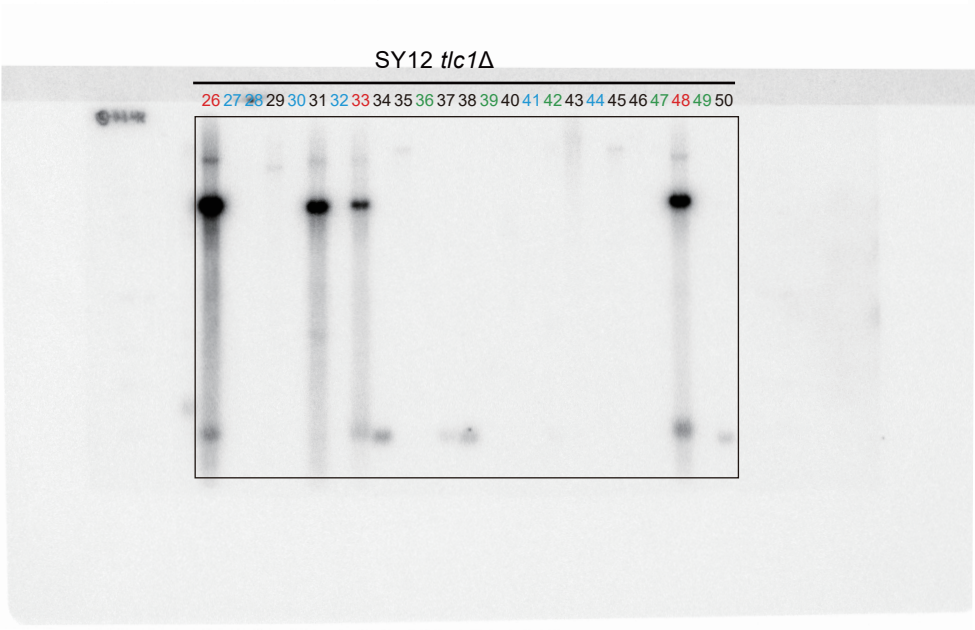

Supplement: fig2-figsupp2-data3 [file elife-91223-fig2-figsupp2-data3-v1.zip]

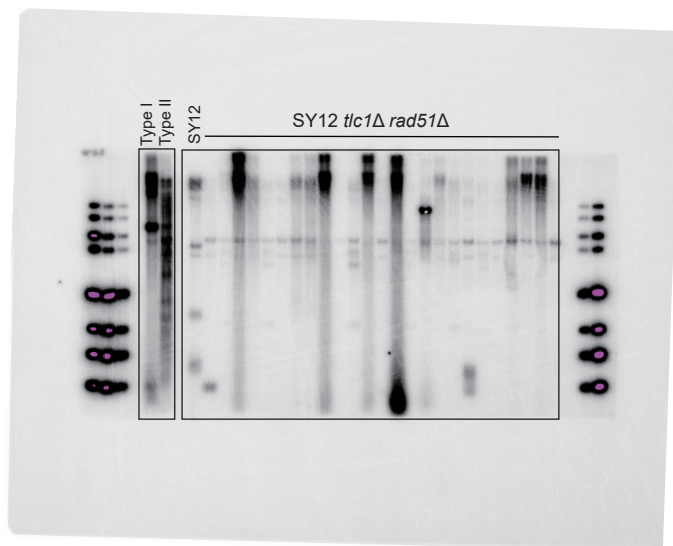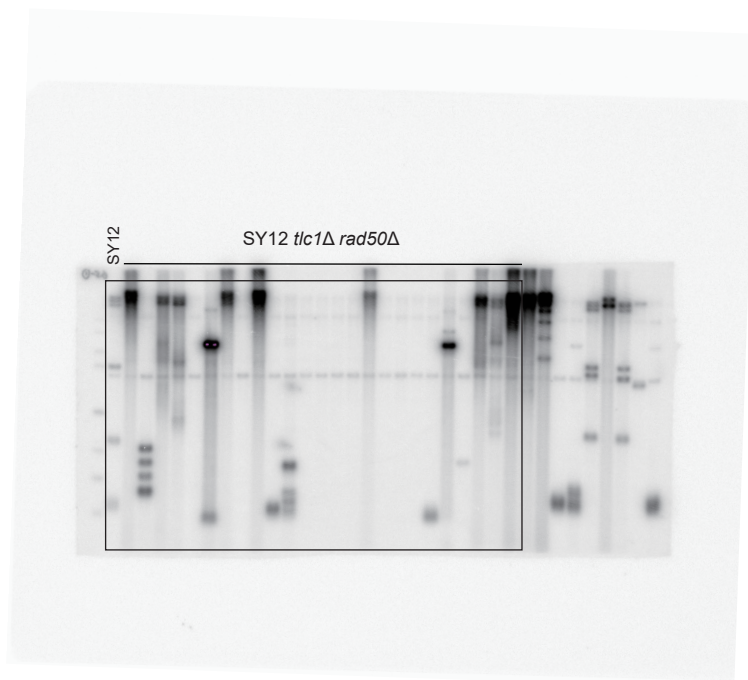

Supplement: fig2-figsupp8-data5 [file elife-91223-fig2-figsupp8-data5-v1.zip]

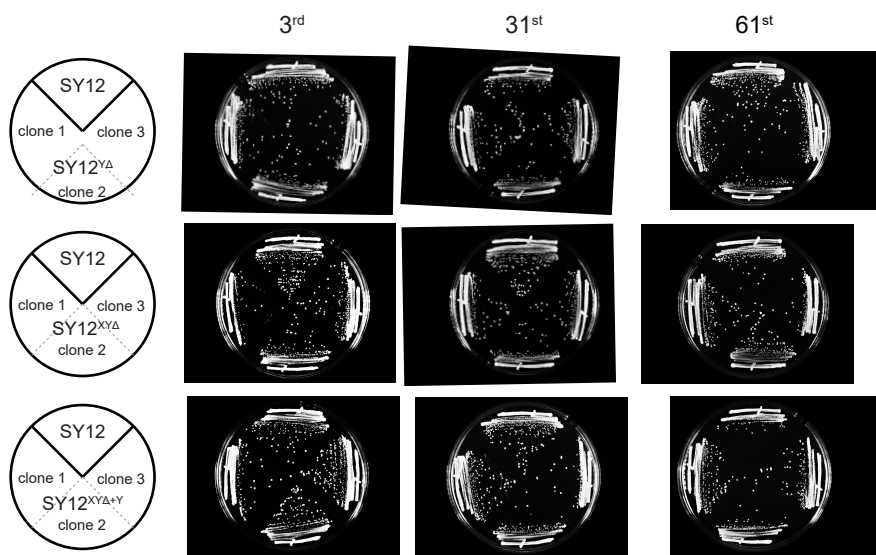

Supplement: fig3-data18 [file elife-91223-fig3-data18-v1.zip]

B

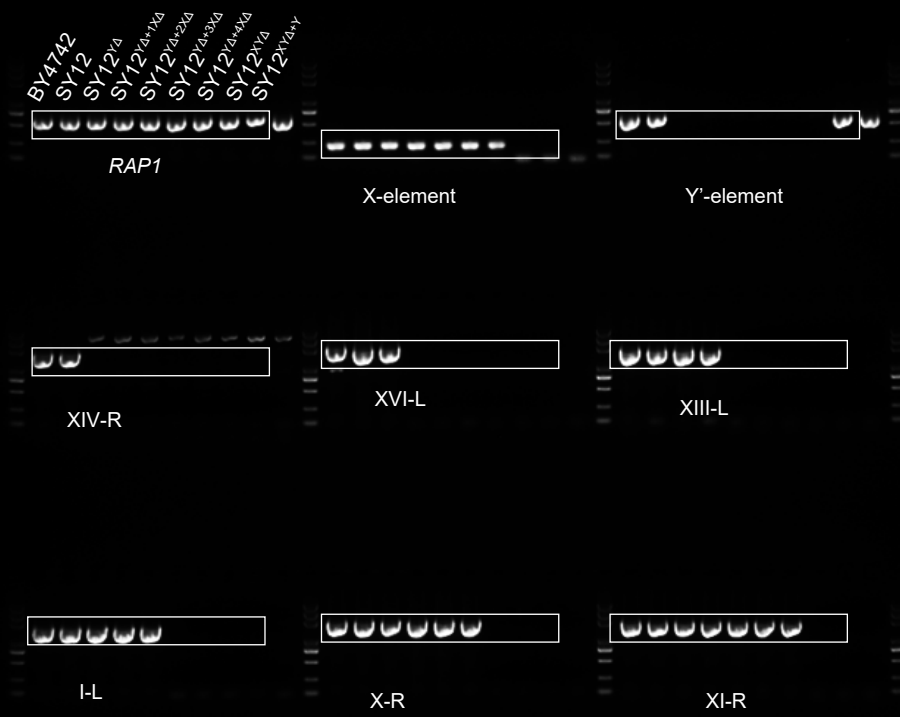

Supplement: fig3-data2 [file elife-91223-fig3-data2-v1.zip]

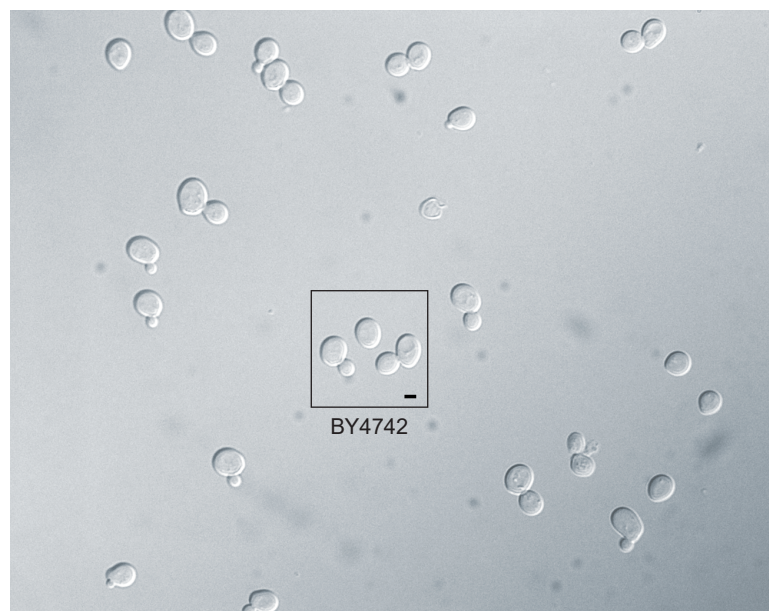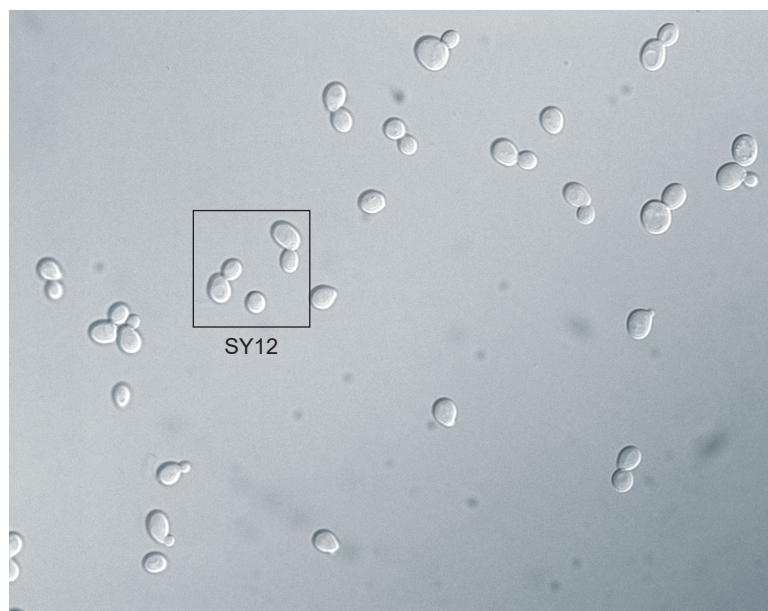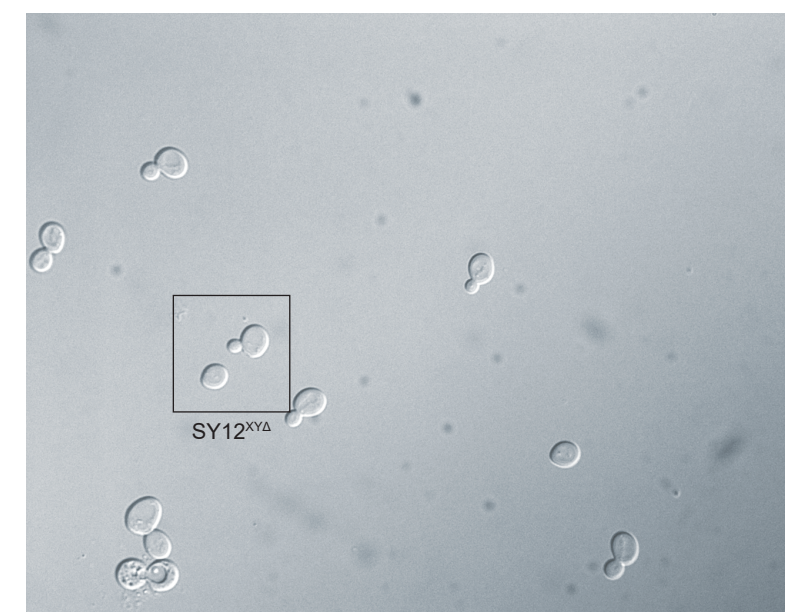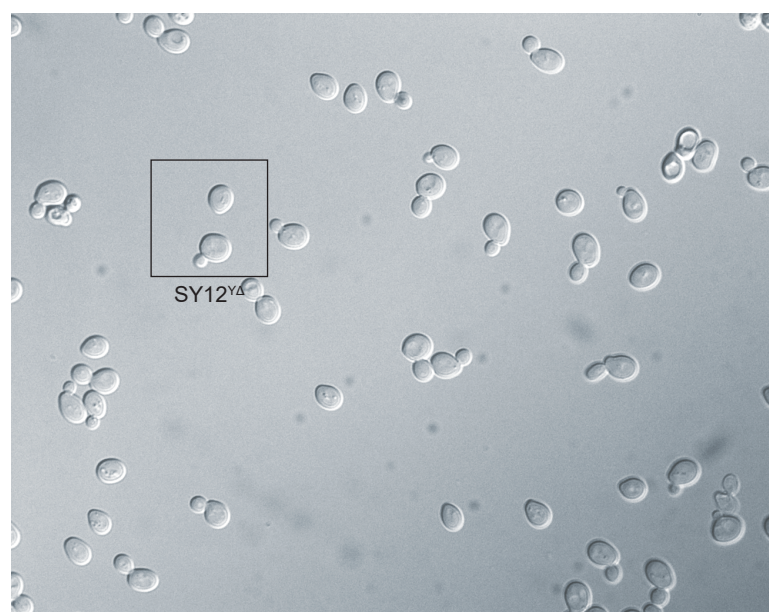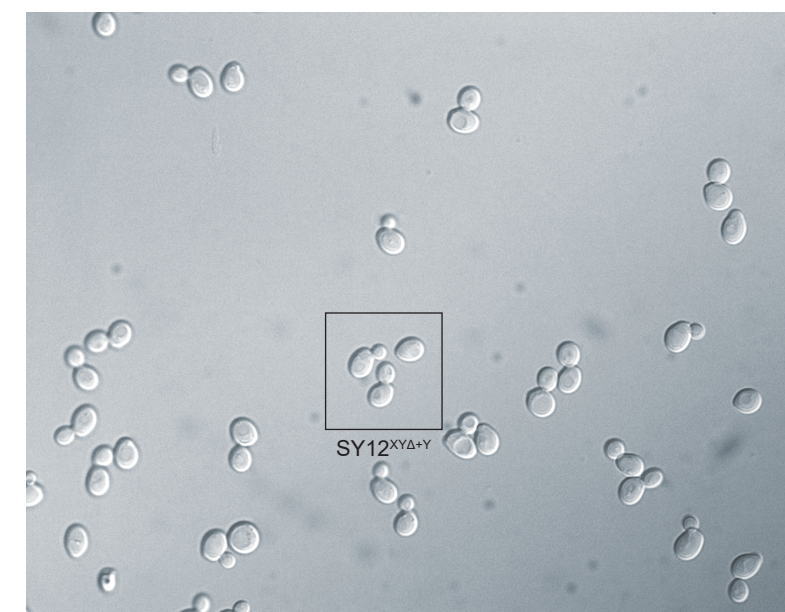

Supplement: fig3-data8 [file elife-91223-fig3-data8-v1.zip]

A

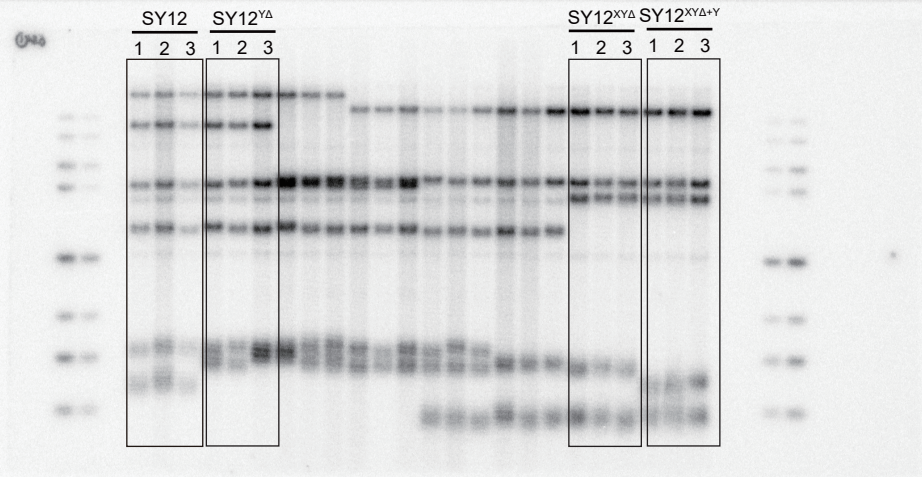

Supplement: fig4-data2 [file PDF containing Figure 4A and original scans of the relevant Southern blot analysis.pdf › PDF containing Figure 4A and original scans of the relevant Southern blot analysis.pdf]

**B**

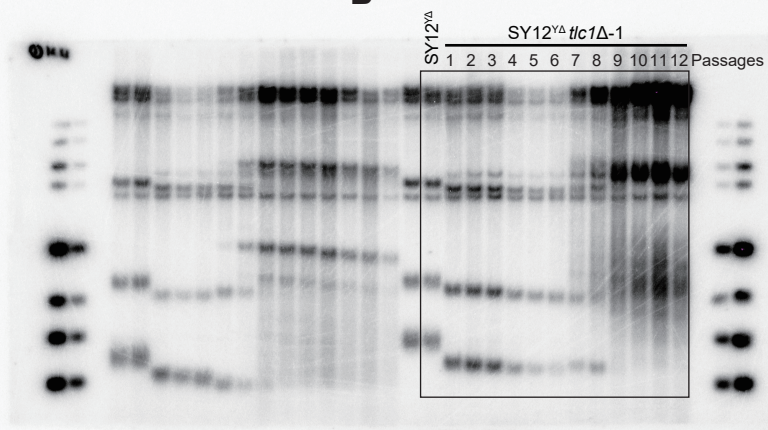

Supplement: fig5-data3 [file PDF containing Figure 5B and original scans of the relevant Southern blot analysis.pdf › PDF containing Figure 5B and original scans of the relevant Southern blot analysis.pdf]

C

SY12<sup>YΔ</sup>

SY12<sup>YΔ</sup> *tlc1Δ*

1 2 3 4 5 6 7 8 9 10 11 12 13 14 15 16 17 18 19 20 21 22 23 24 25

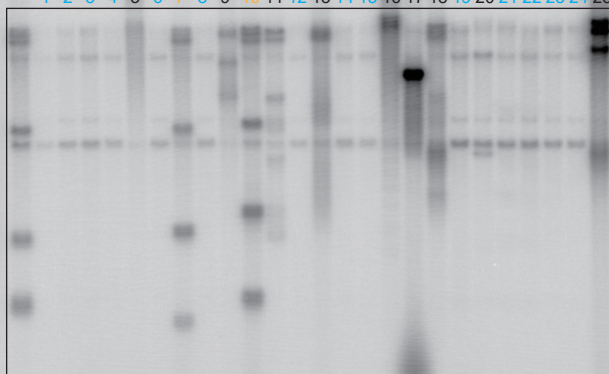

SY12<sup>YΔ</sup> *tlc1Δ*

26 27 28 29 30 31 32 33 34 35 36 37 38 39 40 41 42 43 44 45 46 47 48 49 50

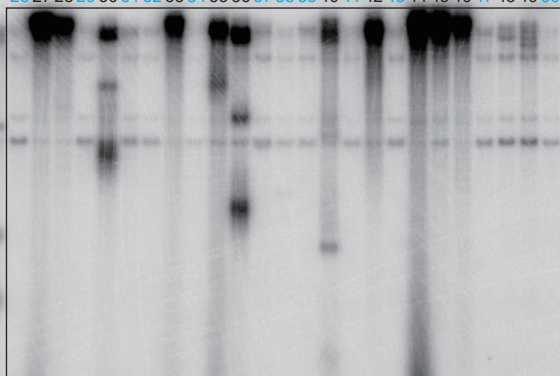

Supplement: fig5-data8 [file elife-91223-fig5-data8-v1.zip]

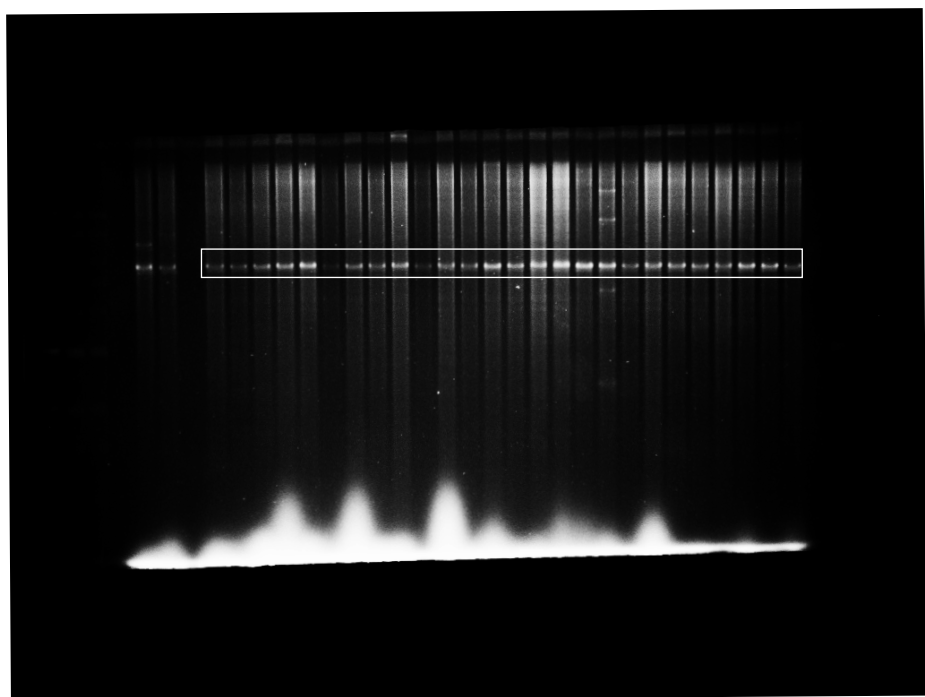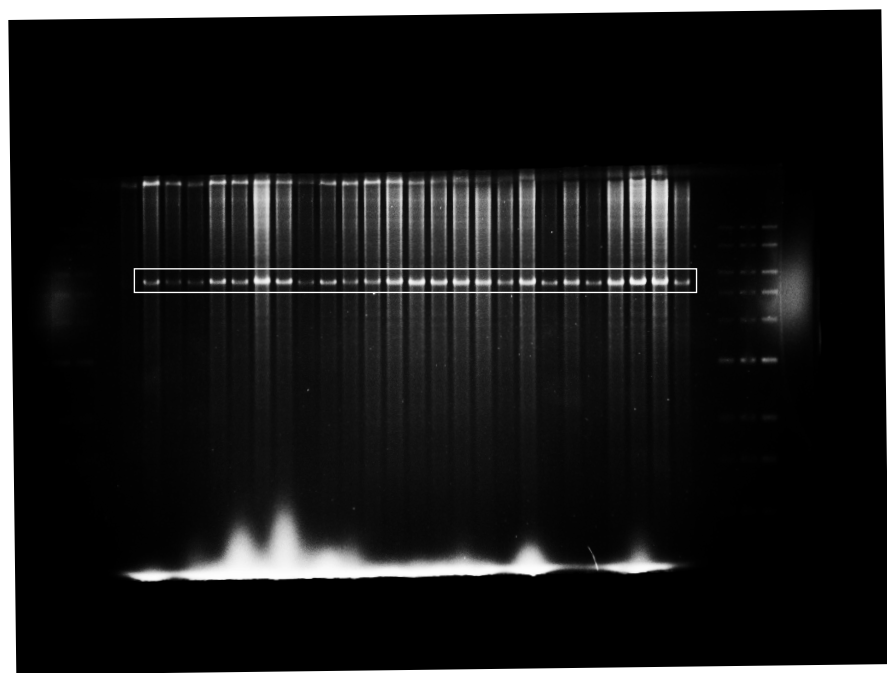

Supplement: fig5-data9 [file PDF containing original scans of the loading contral in Figure 5C.pdf › PDF containing original scans of the loading contral in Figure 5C.pdf]

**B**

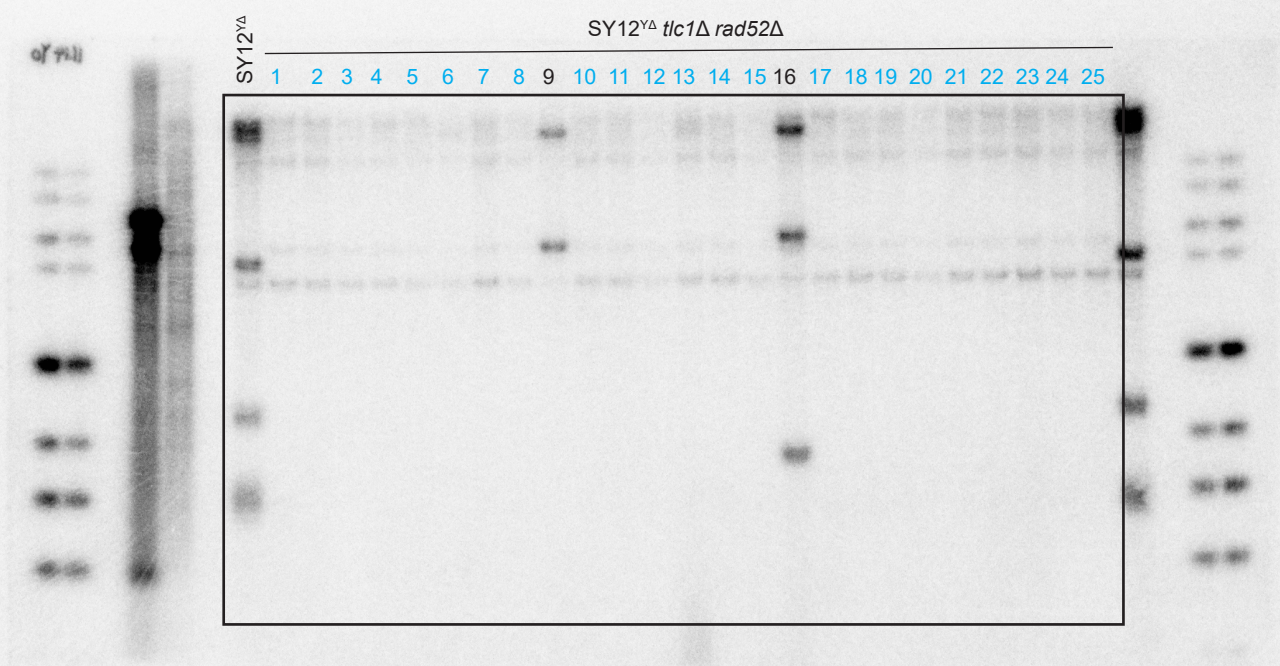

Supplement: fig5-figsupp3-data4 [file elife-91223-fig5-figsupp3-data4-v1.zip]

B

SY12<sup>YΔ</sup>

SY12<sup>YΔ</sup> *tlc1Δ rad52Δ*

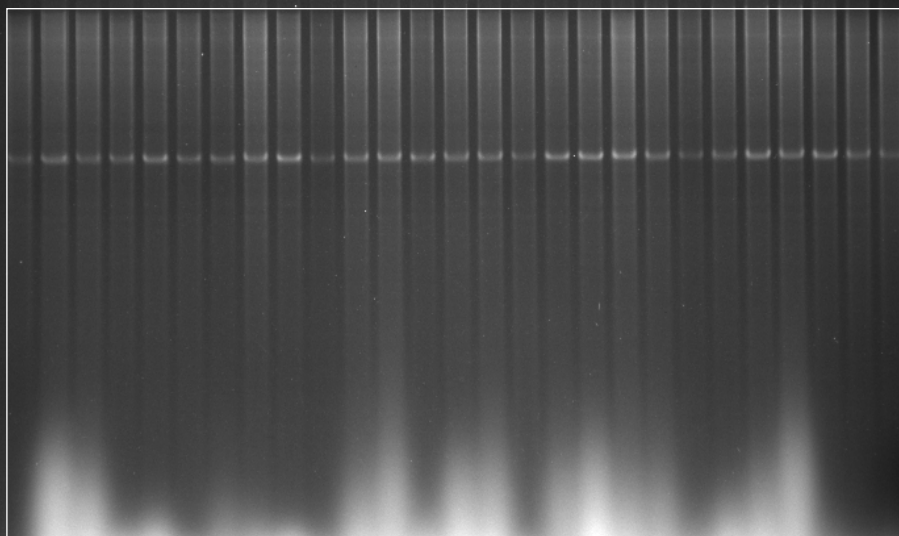

Supplement: fig5-figsupp3-data5 [file elife-91223-fig5-figsupp3-data5-v1.zip]

**B**

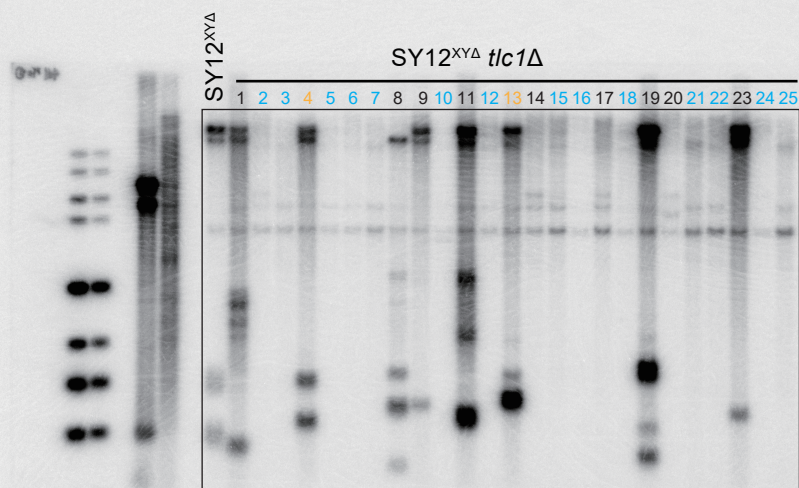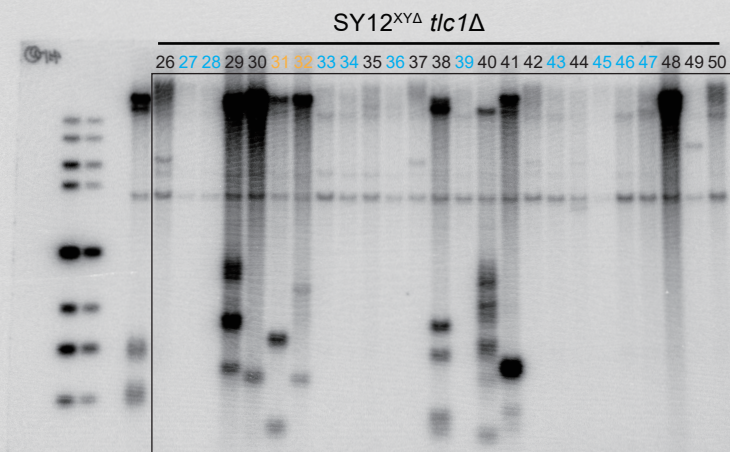

Supplement: fig6-data11 [file PDF containing Figure 6B and original scans of the relevant Southern blot analysis.pdf › PDF containing Figure 6B and original scans of the relevant Southern blot analysis.pdf]

SY12<sup>XYΔ</sup>

SY12<sup>XYΔ</sup> *tlc1Δ*

1 2 3 4 5 6 7 8 9 10 11 12 13 14 15 16 17 18 19 20 21 22 23 24

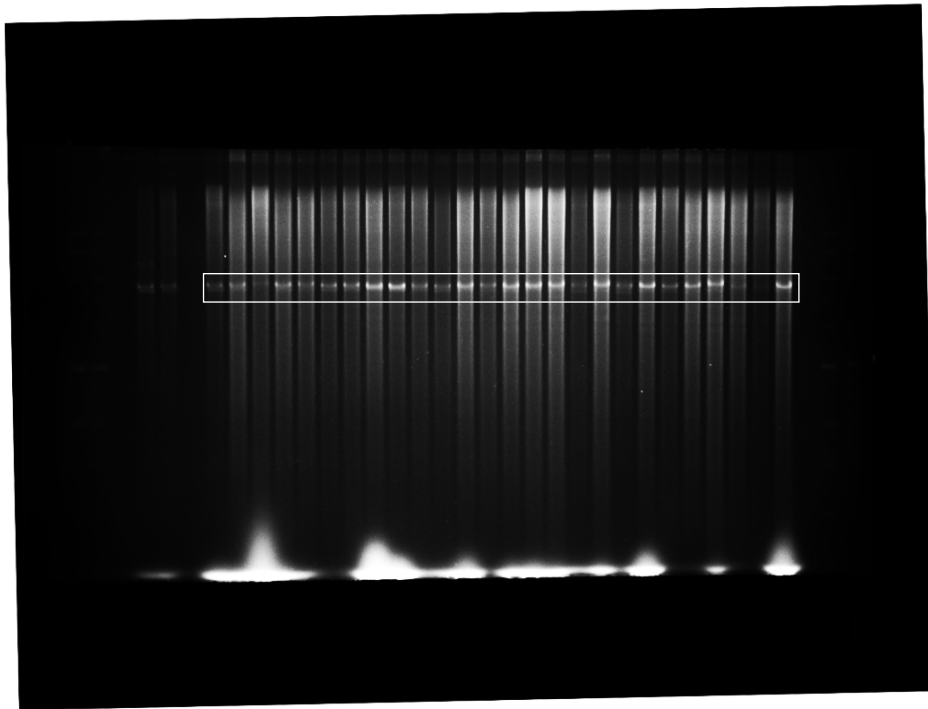

SY12<sup>XYΔ</sup> *tlc1Δ*

25 26 27 28 29 30 31 32 33 34 35 36 37 38 39 40 41 42 43 44 45 46 47 48 49 50

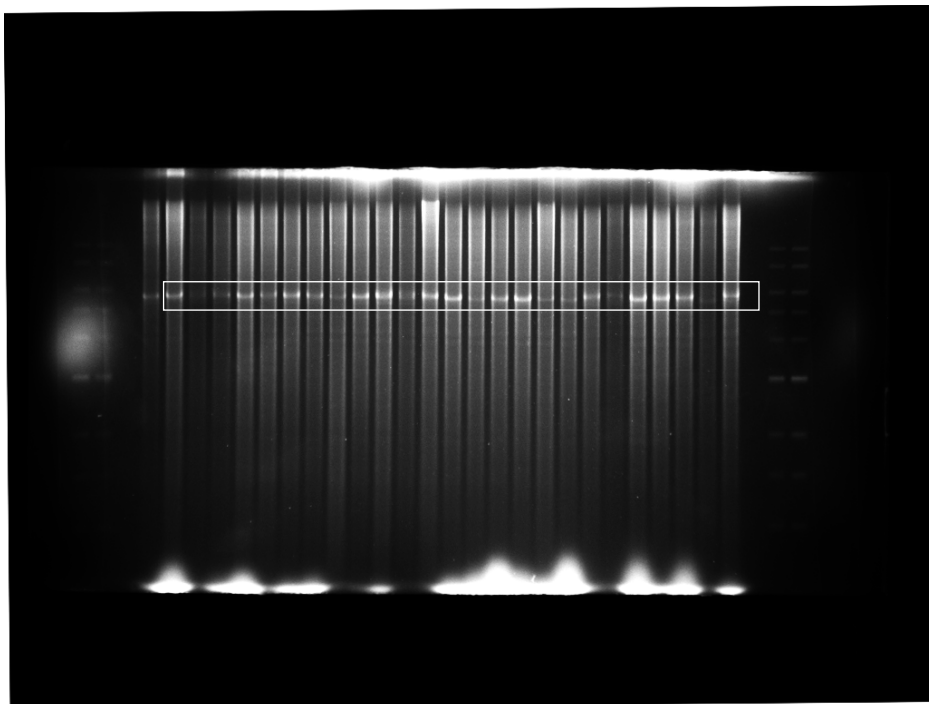

Supplement: fig6-data12 [file elife-91223-fig6-data12-v1.zip]

A

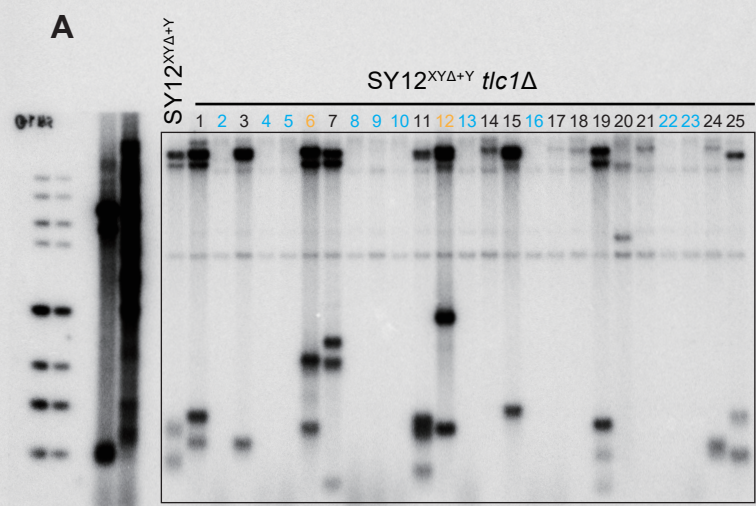

SY12<sup>XYΔ+Y</sup> *tlc1Δ*

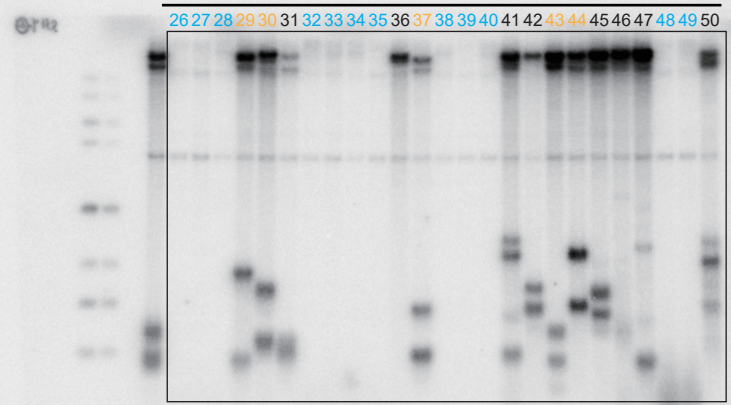

Supplement: fig6-data5 [file elife-91223-fig6-data5-v1.zip]

SY12<sup>XYΔ+Y</sup>

SY12<sup>XYΔ+Y</sup> *tlc1Δ*

1 2 3 4 5 6 7 8 9 10 11 12 13 14 15 16 17 18 19 20 21 22 23 24 25

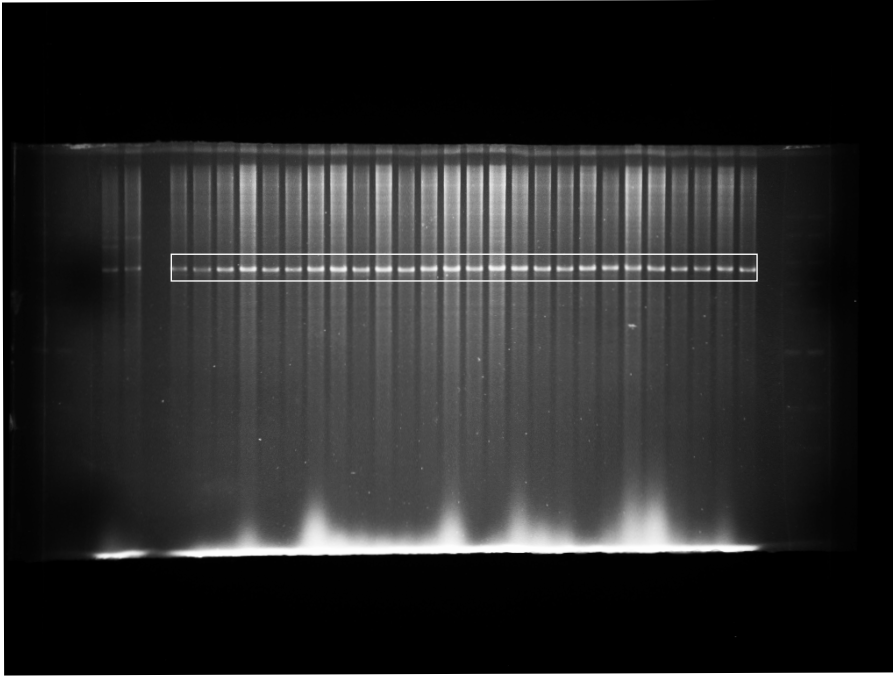

SY12<sup>XYΔ+Y</sup> *tlc1Δ*

26 27 28 29 30 31 32 33 34 35 36 37 38 39 40 41 42 43 44 45 46 47 48 49 50

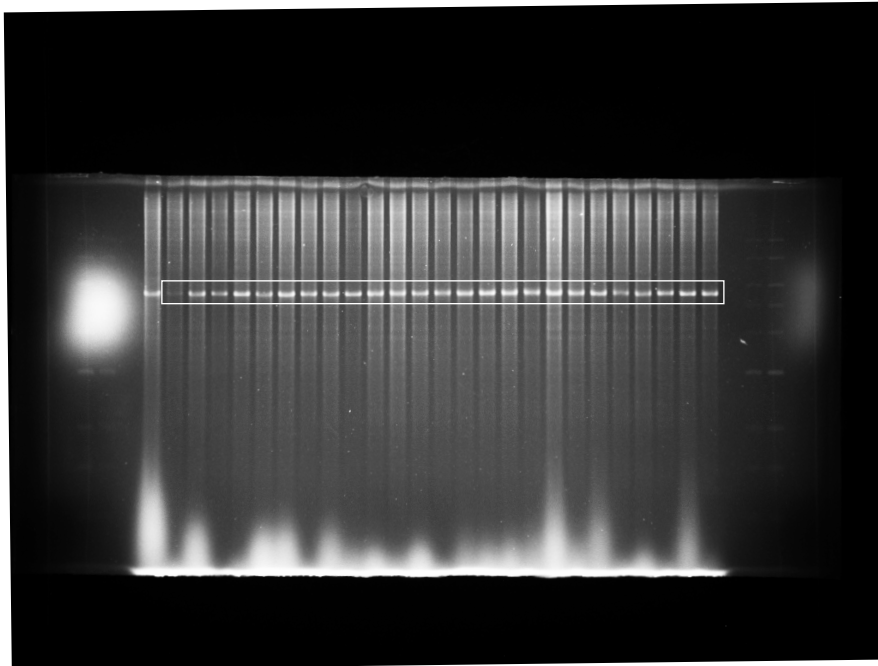

Supplement: fig6-data6 [file PDF containing original scans of the loading contral in Figure 6A.pdf › PDF containing original scans of the loading contral in Figure 6A.pdf]

**B**

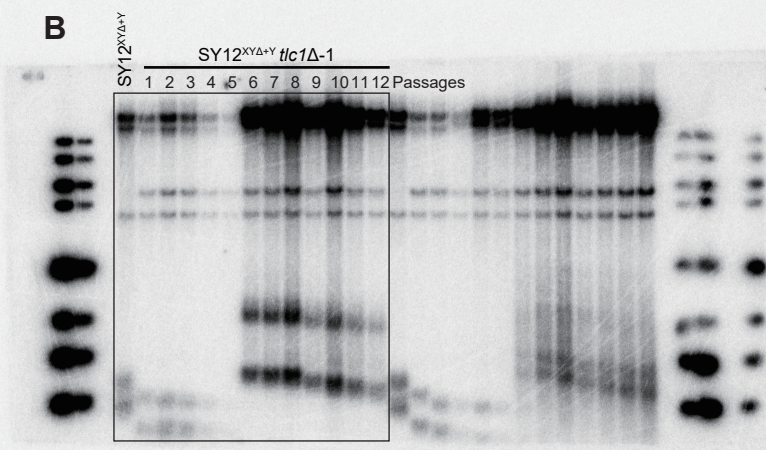

**D**

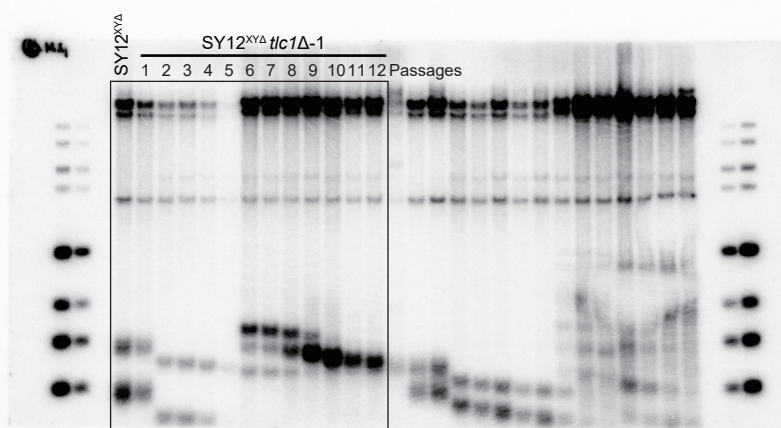

Supplement: fig6-figsupp1-data5 [file elife-91223-fig6-figsupp1-data5-v1.zip]

SY12<sup>XYΔ-Y</sup>  
 SY12<sup>XYΔ-Y</sup>-*flc1Δ* TLC1  
 + SY12<sup>XYΔ-Y</sup> *flc1Δ*-C1  
 + SY12<sup>XYΔ-Y</sup> *flc1Δ*-T1

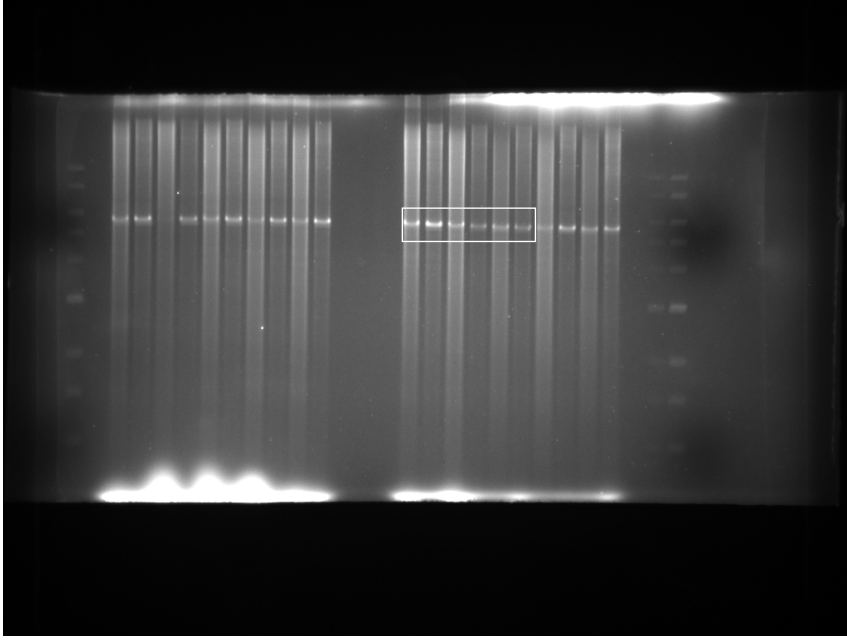

Supplement: fig6-figsupp3-data4 [file elife-91223-fig6-figsupp3-data4-v1.zip]

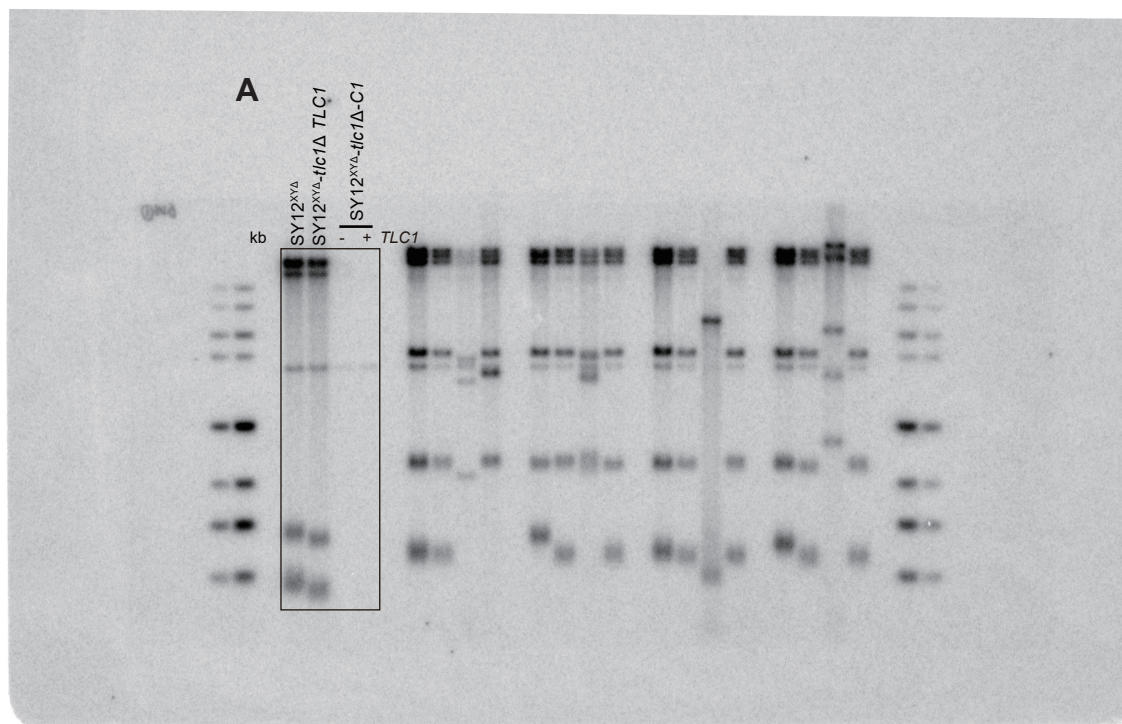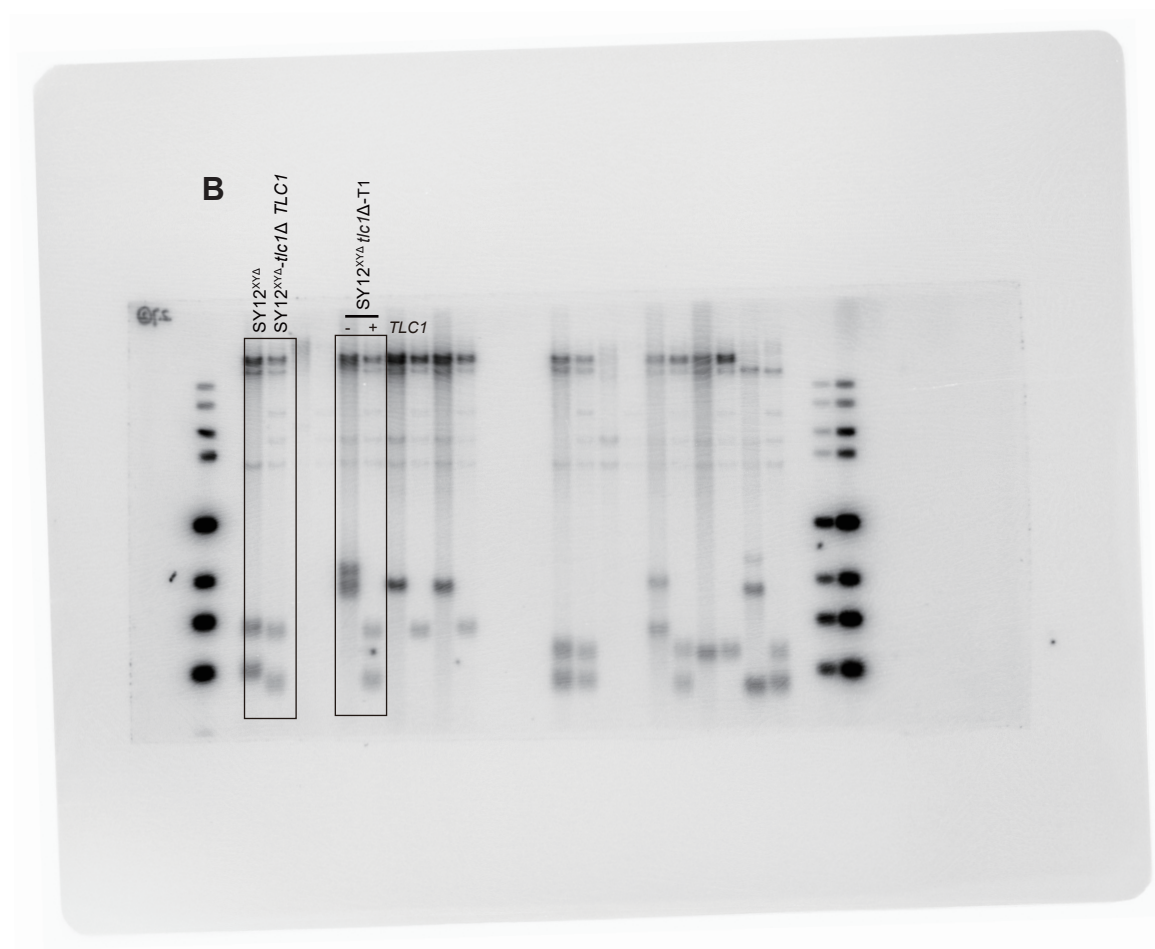

Supplement: fig6-figsupp5-data5 [file elife-91223-fig6-figsupp5-data5-v1.zip]
